# Supplementary material for: The Contribution of Phospholipase A2 and Metalloproteinases to the Synergistic Action of Viper Venom on the Bioenergetic Profile of Vero Cells
Source: Toxins (Basel). 2022 Oct 23;14(11):724. doi: 10.3390/toxins14110724 (PMC9695613; doi:10.3390/toxins14110724)
Supplement: Supplementary file 1 [file toxins-14-00724-s001.zip]

Archive with 4 entries (4 files):
- Figure S1.pdf
- Table S1.xlsm
- Table S2.xlsm
- Table S3.xlsm
