# Supplementary material for: The Contribution of Phospholipase A2 and Metalloproteinases to the Synergistic Action of Viper Venom on the Bioenergetic Profile of Vero Cells
Source: Toxins (Basel). 2022 Oct 23;14(11):724. doi: 10.3390/toxins14110724 (PMC9695613; doi:10.3390/toxins14110724)
Supplement: Supplementary file 1 [file toxins-14-00724-s001.zip › Table S1.xlsm]

## Sheet: L-Normalized Rate (Copy)
Measurement	Well	Group	Time	OCR	ECAR	PPR					Cycles	Value		GroupName	Selected?		Error Type
1	A01	Background	1.56304	0	0	0					Basal	3		Control	TRUE		Standard Deviation	TRUE	FALSE
1	B01	Control	1.56304	154.424	77.4669	137.767						5		LPS (1 ug/ml)	TRUE
1	C01	Control	1.56304	164.436	78.7171	139.991						0
1	D01	Control	1.56304	170.474	69.8187	124.166						0
1	E01	LPS (1 ug/ml)	1.56304	200.766	103.101	183.354						0
1	F01	LPS (1 ug/ml)	1.56304	210.583	109.323	194.42
1	G01	LPS (1 ug/ml)	1.56304	184.519	86.693	154.175
1	H01	Background	1.56304	0	0	0
2	A01	Background	7.09669	0	0	0
2	B01	Control	7.09669	138.952	62.1552	110.537
2	C01	Control	7.09669	150.131	67.4241	119.907
2	D01	Control	7.09669	154.854	56.7095	100.852
2	E01	LPS (1 ug/ml)	7.09669	179.323	75.6732	134.577
2	F01	LPS (1 ug/ml)	7.09669	190.305	86.5832	153.98
2	G01	LPS (1 ug/ml)	7.09669	169.843	71.6799	127.476
2	H01	Background	7.09669	0	0	0
3	A01	Background	12.6256	0	0	0
3	B01	Control	12.6256	135.453	62.7622	111.616
3	C01	Control	12.6256	146.293	69.7346	124.016
3	D01	Control	12.6256	151.066	59.218	105.313
3	E01	LPS (1 ug/ml)	12.6256	171.426	74.0064	131.613
3	F01	LPS (1 ug/ml)	12.6256	182.679	86.1009	153.122
3	G01	LPS (1 ug/ml)	12.6256	163.488	69.9472	124.394
3	H01	Background	12.6256	0	0	0
4	A01	Background	18.2352	0	0	0
4	B01	Control	18.2352	165.503	121.501	216.078
4	C01	Control	18.2352	222.024	139.037	247.264
4	D01	Control	18.2352	228.195	131.079	233.111
4	E01	LPS (1 ug/ml)	18.2352	294.653	154.226	274.276
4	F01	LPS (1 ug/ml)	18.2352	332.854	162.374	288.765
4	G01	LPS (1 ug/ml)	18.2352	294.067	138.609	246.502
4	H01	Background	18.2352	0	0	0
5	A01	Background	23.772	0	0	0
5	B01	Control	23.772	131.034	110.473	196.465
5	C01	Control	23.772	174.12	121.827	216.657
5	D01	Control	23.772	183.335	111.725	198.693
5	E01	LPS (1 ug/ml)	23.772	227.041	124.333	221.113
5	F01	LPS (1 ug/ml)	23.772	297.551	140.264	249.446
5	G01	LPS (1 ug/ml)	23.772	249.508	123.613	219.834
5	H01	Background	23.772	0	0	0
6	A01	Background	29.3022	0	0	0
6	B01	Control	29.3022	123.248	107.938	191.956
6	C01	Control	29.3022	160.911	119.502	212.523
6	D01	Control	29.3022	168.968	106.594	189.566
6	E01	LPS (1 ug/ml)	29.3022	196.129	120.097	213.58
6	F01	LPS (1 ug/ml)	29.3022	263.719	135.919	241.718
6	G01	LPS (1 ug/ml)	29.3022	221.783	121.081	215.331
6	H01	Background	29.3022	0	0	0
7	A01	Background	34.8316	0	0	0
7	B01	Control	34.8316	122.271	112.077	199.317
7	C01	Control	34.8316	155.92	122.173	217.272
7	D01	Control	34.8316	165.305	109.637	194.978
7	E01	LPS (1 ug/ml)	34.8316	187.875	124.306	221.066
7	F01	LPS (1 ug/ml)	34.8316	248.764	139.022	247.236
7	G01	LPS (1 ug/ml)	34.8316	209.868	123.624	219.854
7	H01	Background	34.8316	0	0	0
8	A01	Background	40.3698	0	0	0															BASELINE				MAXIMAL
8	B01	Control	40.3698	124.044	116.475	207.138
8	C01	Control	40.3698	154.248	127.107	226.047
8	D01	Control	40.3698	164.247	114.184	203.065														GST-GLUCOSE-No Pretreatments	22.1105	3.65853	160.703	13.9487	91.6944	10.2905	137.937	13.2149
8	E01	LPS (1 ug/ml)	40.3698	186.699	129.282	229.915														MST-OLIGO-No Pretreatments	34.4535	5.68932	149.468	11.1549	77.5115	7.85346	368.212	32.8695
8	F01	LPS (1 ug/ml)	40.3698	241.13	142.719	253.812
8	G01	LPS (1 ug/ml)	40.3698	203.935	124.226	220.924
8	H01	Background	40.3698	0	0	0

## Sheet: L-Normalized Rate
Measurement	Well	Group	Time	OCR	ECAR	PPR					Cycles	Value		GroupName	Selected?		Error Type
1	A01	Background	1.56304	0	0	0					Basal	3		Control	TRUE		Standard Deviation	TRUE	FALSE
1	B01	Control	1.56304	154.424	77.4669	137.767						5		LPS (1 ug/ml)	TRUE
1	C01	Control	1.56304	164.436	78.7171	139.991						0
1	D01	Control	1.56304	170.474	69.8187	124.166						0
1	E01	LPS (1 ug/ml)	1.56304	200.766	103.101	183.354						0
1	F01	LPS (1 ug/ml)	1.56304	210.583	109.323	194.42
1	G01	LPS (1 ug/ml)	1.56304	184.519	86.693	154.175
1	H01	Background	1.56304	0	0	0
2	A01	Background	7.09669	0	0	0
2	B01	Control	7.09669	138.952	62.1552	110.537
2	C01	Control	7.09669	150.131	67.4241	119.907
2	D01	Control	7.09669	154.854	56.7095	100.852
2	E01	LPS (1 ug/ml)	7.09669	179.323	75.6732	134.577
2	F01	LPS (1 ug/ml)	7.09669	190.305	86.5832	153.98
2	G01	LPS (1 ug/ml)	7.09669	169.843	71.6799	127.476
2	H01	Background	7.09669	0	0	0
3	A01	Background	12.6256	0	0	0
3	B01	Control	12.6256	135.453	62.7622	111.616
3	C01	Control	12.6256	146.293	69.7346	124.016
3	D01	Control	12.6256	151.066	59.218	105.313
3	E01	LPS (1 ug/ml)	12.6256	171.426	74.0064	131.613
3	F01	LPS (1 ug/ml)	12.6256	182.679	86.1009	153.122
3	G01	LPS (1 ug/ml)	12.6256	163.488	69.9472	124.394
3	H01	Background	12.6256	0	0	0
4	A01	Background	18.2352	0	0	0
4	B01	Control	18.2352	165.503	121.501	216.078
4	C01	Control	18.2352	222.024	139.037	247.264
4	D01	Control	18.2352	228.195	131.079	233.111
4	E01	LPS (1 ug/ml)	18.2352	294.653	154.226	274.276
4	F01	LPS (1 ug/ml)	18.2352	332.854	162.374	288.765
4	G01	LPS (1 ug/ml)	18.2352	294.067	138.609	246.502
4	H01	Background	18.2352	0	0	0
5	A01	Background	23.772	0	0	0
5	B01	Control	23.772	131.034	110.473	196.465
5	C01	Control	23.772	174.12	121.827	216.657
5	D01	Control	23.772	183.335	111.725	198.693
5	E01	LPS (1 ug/ml)	23.772	227.041	124.333	221.113
5	F01	LPS (1 ug/ml)	23.772	297.551	140.264	249.446
5	G01	LPS (1 ug/ml)	23.772	249.508	123.613	219.834
5	H01	Background	23.772	0	0	0
6	A01	Background	29.3022	0	0	0
6	B01	Control	29.3022	123.248	107.938	191.956
6	C01	Control	29.3022	160.911	119.502	212.523
6	D01	Control	29.3022	168.968	106.594	189.566
6	E01	LPS (1 ug/ml)	29.3022	196.129	120.097	213.58
6	F01	LPS (1 ug/ml)	29.3022	263.719	135.919	241.718
6	G01	LPS (1 ug/ml)	29.3022	221.783	121.081	215.331
6	H01	Background	29.3022	0	0	0
7	A01	Background	34.8316	0	0	0
7	B01	Control	34.8316	122.271	112.077	199.317
7	C01	Control	34.8316	155.92	122.173	217.272
7	D01	Control	34.8316	165.305	109.637	194.978
7	E01	LPS (1 ug/ml)	34.8316	187.875	124.306	221.066
7	F01	LPS (1 ug/ml)	34.8316	248.764	139.022	247.236
7	G01	LPS (1 ug/ml)	34.8316	209.868	123.624	219.854
7	H01	Background	34.8316	0	0	0
8	A01	Background	40.3698	0	0	0															BASELINE				MAXIMAL
8	B01	Control	40.3698	124.044	116.475	207.138
8	C01	Control	40.3698	154.248	127.107	226.047
8	D01	Control	40.3698	164.247	114.184	203.065														GST-GLUCOSE-No Pretreatments	22.1105	3.65853	160.703	13.9487	91.6944	10.2905	137.937	13.2149
8	E01	LPS (1 ug/ml)	40.3698	186.699	129.282	229.915														MST-OLIGO-No Pretreatments	34.4535	5.68932	149.468	11.1549	77.5115	7.85346	368.212	32.8695
8	F01	LPS (1 ug/ml)	40.3698	241.13	142.719	253.812
8	G01	LPS (1 ug/ml)	40.3698	203.935	124.226	220.924
8	H01	Background	40.3698	0	0	0

## Sheet: groups
Measurement	Well	Group	Time	OCR	ECAR	PPR					Cycles	Value		GroupName	Selected?		Error Type
1	A01	Background	1.56304	0	0	0					Basal	3		MO	TRUE		Standard Deviation	TRUE	TRUE
1	B01	Control	1.56304	154.424	77.4669	137.767						3		MO+BPB	TRUE
1	C01	Control	1.56304	164.436	78.7171	139.991						3		MO+EDTA	TRUE
1	D01	Control	1.56304	170.474	69.8187	124.166						0		Medium	TRUE
1	E01	LPS (1 ug/ml)	1.56304	200.766	103.101	183.354						0		Phonotype kit	TRUE
1	F01	LPS (1 ug/ml)	1.56304	210.583	109.323	194.42
1	G01	LPS (1 ug/ml)	1.56304	184.519	86.693	154.175
1	H01	Background	1.56304	0	0	0
2	A01	Background	7.09669	0	0	0
2	B01	Control	7.09669	138.952	62.1552	110.537
2	C01	Control	7.09669	150.131	67.4241	119.907
2	D01	Control	7.09669	154.854	56.7095	100.852
2	E01	LPS (1 ug/ml)	7.09669	179.323	75.6732	134.577
2	F01	LPS (1 ug/ml)	7.09669	190.305	86.5832	153.98
2	G01	LPS (1 ug/ml)	7.09669	169.843	71.6799	127.476
2	H01	Background	7.09669	0	0	0
3	A01	Background	12.6256	0	0	0
3	B01	Control	12.6256	135.453	62.7622	111.616
3	C01	Control	12.6256	146.293	69.7346	124.016
3	D01	Control	12.6256	151.066	59.218	105.313
3	E01	LPS (1 ug/ml)	12.6256	171.426	74.0064	131.613
3	F01	LPS (1 ug/ml)	12.6256	182.679	86.1009	153.122
3	G01	LPS (1 ug/ml)	12.6256	163.488	69.9472	124.394
3	H01	Background	12.6256	0	0	0
4	A01	Background	18.2352	0	0	0
4	B01	Control	18.2352	165.503	121.501	216.078
4	C01	Control	18.2352	222.024	139.037	247.264
4	D01	Control	18.2352	228.195	131.079	233.111
4	E01	LPS (1 ug/ml)	18.2352	294.653	154.226	274.276
4	F01	LPS (1 ug/ml)	18.2352	332.854	162.374	288.765
4	G01	LPS (1 ug/ml)	18.2352	294.067	138.609	246.502
4	H01	Background	18.2352	0	0	0
5	A01	Background	23.772	0	0	0
5	B01	Control	23.772	131.034	110.473	196.465
5	C01	Control	23.772	174.12	121.827	216.657
5	D01	Control	23.772	183.335	111.725	198.693
5	E01	LPS (1 ug/ml)	23.772	227.041	124.333	221.113
5	F01	LPS (1 ug/ml)	23.772	297.551	140.264	249.446
5	G01	LPS (1 ug/ml)	23.772	249.508	123.613	219.834
5	H01	Background	23.772	0	0	0
6	A01	Background	29.3022	0	0	0
6	B01	Control	29.3022	123.248	107.938	191.956
6	C01	Control	29.3022	160.911	119.502	212.523
6	D01	Control	29.3022	168.968	106.594	189.566
6	E01	LPS (1 ug/ml)	29.3022	196.129	120.097	213.58
6	F01	LPS (1 ug/ml)	29.3022	263.719	135.919	241.718
6	G01	LPS (1 ug/ml)	29.3022	221.783	121.081	215.331
6	H01	Background	29.3022	0	0	0
7	A01	Background	34.8316	0	0	0
7	B01	Control	34.8316	122.271	112.077	199.317
7	C01	Control	34.8316	155.92	122.173	217.272
7	D01	Control	34.8316	165.305	109.637	194.978
7	E01	LPS (1 ug/ml)	34.8316	187.875	124.306	221.066
7	F01	LPS (1 ug/ml)	34.8316	248.764	139.022	247.236
7	G01	LPS (1 ug/ml)	34.8316	209.868	123.624	219.854
7	H01	Background	34.8316	0	0	0
8	A01	Background	40.3698	0	0	0															BASELINE				MAXIMAL
8	B01	Control	40.3698	124.044	116.475	207.138
8	C01	Control	40.3698	154.248	127.107	226.047
8	D01	Control	40.3698	164.247	114.184	203.065															22.1105	3.65853	160.703	13.9487	91.6944	10.2905	137.937	13.2149
8	E01	LPS (1 ug/ml)	40.3698	186.699	129.282	229.915															34.4535	5.68932	149.468	11.1549	77.5115	7.85346	368.212	32.8695
8	F01	LPS (1 ug/ml)	40.3698	241.13	142.719	253.812
8	G01	LPS (1 ug/ml)	40.3698	203.935	124.226	220.924
8	H01	Background	40.3698	0	0	0

## Sheet: L-Rate
Measurement	Well	Group	Time	OCR	ECAR	PPR					Cycles	Value		GroupName	Selected?		Error Type
1	A01	Background	1.56304	0	0	0					Basal	6		C. Elegans 10k	TRUE		Standard Deviation	TRUE	TRUE
1	B01	Control	1.56304	154.424	77.4669	137.767						10		C. Elegans 20k	TRUE
1	C01	Control	1.56304	164.436	78.7171	139.991						0
1	D01	Control	1.56304	170.474	69.8187	124.166						0
1	E01	LPS (1 ug/ml)	1.56304	200.766	103.101	183.354						0
1	F01	LPS (1 ug/ml)	1.56304	210.583	109.323	194.42
1	G01	LPS (1 ug/ml)	1.56304	184.519	86.693	154.175
1	H01	Background	1.56304	0	0	0
2	A01	Background	7.09669	0	0	0
2	B01	Control	7.09669	138.952	62.1552	110.537
2	C01	Control	7.09669	150.131	67.4241	119.907
2	D01	Control	7.09669	154.854	56.7095	100.852
2	E01	LPS (1 ug/ml)	7.09669	179.323	75.6732	134.577
2	F01	LPS (1 ug/ml)	7.09669	190.305	86.5832	153.98
2	G01	LPS (1 ug/ml)	7.09669	169.843	71.6799	127.476
2	H01	Background	7.09669	0	0	0
3	A01	Background	12.6256	0	0	0
3	B01	Control	12.6256	135.453	62.7622	111.616
3	C01	Control	12.6256	146.293	69.7346	124.016
3	D01	Control	12.6256	151.066	59.218	105.313
3	E01	LPS (1 ug/ml)	12.6256	171.426	74.0064	131.613
3	F01	LPS (1 ug/ml)	12.6256	182.679	86.1009	153.122
3	G01	LPS (1 ug/ml)	12.6256	163.488	69.9472	124.394
3	H01	Background	12.6256	0	0	0
4	A01	Background	18.2352	0	0	0
4	B01	Control	18.2352	165.503	121.501	216.078
4	C01	Control	18.2352	222.024	139.037	247.264
4	D01	Control	18.2352	228.195	131.079	233.111
4	E01	LPS (1 ug/ml)	18.2352	294.653	154.226	274.276
4	F01	LPS (1 ug/ml)	18.2352	332.854	162.374	288.765
4	G01	LPS (1 ug/ml)	18.2352	294.067	138.609	246.502
4	H01	Background	18.2352	0	0	0
5	A01	Background	23.772	0	0	0
5	B01	Control	23.772	131.034	110.473	196.465
5	C01	Control	23.772	174.12	121.827	216.657
5	D01	Control	23.772	183.335	111.725	198.693
5	E01	LPS (1 ug/ml)	23.772	227.041	124.333	221.113
5	F01	LPS (1 ug/ml)	23.772	297.551	140.264	249.446
5	G01	LPS (1 ug/ml)	23.772	249.508	123.613	219.834
5	H01	Background	23.772	0	0	0
6	A01	Background	29.3022	0	0	0
6	B01	Control	29.3022	123.248	107.938	191.956
6	C01	Control	29.3022	160.911	119.502	212.523
6	D01	Control	29.3022	168.968	106.594	189.566
6	E01	LPS (1 ug/ml)	29.3022	196.129	120.097	213.58
6	F01	LPS (1 ug/ml)	29.3022	263.719	135.919	241.718
6	G01	LPS (1 ug/ml)	29.3022	221.783	121.081	215.331
6	H01	Background	29.3022	0	0	0
7	A01	Background	34.8316	0	0	0
7	B01	Control	34.8316	122.271	112.077	199.317
7	C01	Control	34.8316	155.92	122.173	217.272
7	D01	Control	34.8316	165.305	109.637	194.978
7	E01	LPS (1 ug/ml)	34.8316	187.875	124.306	221.066
7	F01	LPS (1 ug/ml)	34.8316	248.764	139.022	247.236
7	G01	LPS (1 ug/ml)	34.8316	209.868	123.624	219.854
7	H01	Background	34.8316	0	0	0
8	A01	Background	40.3698	0	0	0															BASELINE				MAXIMAL
8	B01	Control	40.3698	124.044	116.475	207.138
8	C01	Control	40.3698	154.248	127.107	226.047
8	D01	Control	40.3698	164.247	114.184	203.065														GST-GLUCOSE-No Pretreatments	22.1105	3.65853	160.703	13.9487	91.6944	10.2905	137.937	13.2149
8	E01	LPS (1 ug/ml)	40.3698	186.699	129.282	229.915														MST-OLIGO-No Pretreatments	34.4535	5.68932	149.468	11.1549	77.5115	7.85346	368.212	32.8695
8	F01	LPS (1 ug/ml)	40.3698	241.13	142.719	253.812
8	G01	LPS (1 ug/ml)	40.3698	203.935	124.226	220.924
8	H01	Background	40.3698	0	0	0

## Sheet: Rate (Copy)
Measurement	Well	Group	Time	OCR	ECAR	PPR
1	A01	Background	1.58916	0	0	0
1	B01	Medium	1.58916	181.387	69.1415	0
1	C01	Phonotype kit	1.58916	175.253	70.013	0
1	D01	MO	1.58916	175.889	57.8926	0
1	E01	MO+BPB	1.58916	188.427	56.9088	0
1	F01	MO+EDTA	1.58916	186.978	57.6183	0
1	G01	MO+EDTA	1.58916	179.965	55.6614	0
1	H01	Background	1.58916	0	0	0
2	A01	Background	8.19185	0	0	0
2	B01	Medium	8.19185	144.659	65.7638	0
2	C01	Phonotype kit	8.19185	148.325	68.384	0
2	D01	MO	8.19185	153.837	56.4255	0
2	E01	MO+BPB	8.19185	157.302	57.3624	0
2	F01	MO+EDTA	8.19185	156.331	54.9484	0
2	G01	MO+EDTA	8.19185	150.935	53.3241	0
2	H01	Background	8.19185	0	0	0
3	A01	Background	14.7979	0	0	0
3	B01	Medium	14.7979	131.456	64.1482	0
3	C01	Phonotype kit	14.7979	136.045	67.1667	0
3	D01	MO	14.7979	142.138	56.6916	0
3	E01	MO+BPB	14.7979	148.214	55.3318	0
3	F01	MO+EDTA	14.7979	147.139	54.0963	0
3	G01	MO+EDTA	14.7979	142.365	52.0351	0
3	H01	Background	14.7979	0	0	0
4	A01	Background	21.487	0	0	0
4	B01	Medium	21.487	121.39	65.5134	0
4	C01	Phonotype kit	21.487	158.836	88.835	0
4	D01	MO	21.487	167.32	64.6715	0
4	E01	MO+BPB	21.487	201.11	50.4496	0
4	F01	MO+EDTA	21.487	219.424	48.3211	0
4	G01	MO+EDTA	21.487	213.53	46.9791	0
4	H01	Background	21.487	0	0	0
5	A01	Background	28.0976	0	0	0
5	B01	Medium	28.0976	116.536	66.3743	0
5	C01	Phonotype kit	28.0976	137.72	79.5727	0
5	D01	MO	28.0976	156.205	62.598	0
5	E01	MO+BPB	28.0976	165.921	49.8335	0
5	F01	MO+EDTA	28.0976	173.429	48.1768	0
5	G01	MO+EDTA	28.0976	164.174	46.0351	0
5	H01	Background	28.0976	0	0	0
6	A01	Background	34.707	0	0	0
6	B01	Medium	34.707	110.755	67.8588	0
6	C01	Phonotype kit	34.707	126.184	77.4264	0
6	D01	MO	34.707	143.154	63.7251	0
6	E01	MO+BPB	34.707	151.37	49.8408	0
6	F01	MO+EDTA	34.707	157.51	48.2816	0
6	G01	MO+EDTA	34.707	148.309	46.0093	0
6	H01	Background	34.707	0	0	0
7	A01	Background	41.3949	0	0	0
7	B01	Medium	41.3949	105.366	68.855	0
7	C01	Phonotype kit	41.3949	115.391	76.5042	0
7	D01	MO	41.3949	140.616	64.0837	0
7	E01	MO+BPB	41.3949	145.633	50.2836	0
7	F01	MO+EDTA	41.3949	154.055	48.5308	0
7	G01	MO+EDTA	41.3949	146.115	48.2801	0
7	H01	Background	41.3949	0	0	0
8	A01	Background	47.9726	0	0	0
8	B01	Medium	47.9726	100.799	69.7749	0
8	C01	Phonotype kit	47.9726	110.175	76.4507	0
8	D01	MO	47.9726	145.324	64.948	0
8	E01	MO+BPB	47.9726	143.838	50.5704	0
8	F01	MO+EDTA	47.9726	155.852	51.2695	0
8	G01	MO+EDTA	47.9726	146.919	48.4649	0
8	H01	Background	47.9726	0	0	0
9	A01	Background	54.5507	0	0	0
9	B01	Medium	54.5507	96.6563	70.3756	0
9	C01	Phonotype kit	54.5507	106.555	75.6534	0
9	D01	MO	54.5507	149.327	65.6325	0
9	E01	MO+BPB	54.5507	142.856	51.8641	0
9	F01	MO+EDTA	54.5507	160.437	51.7082	0
9	G01	MO+EDTA	54.5507	151.481	48.7744	0
9	H01	Background	54.5507	0	0	0

## Sheet: Assay Configuration
XFe Assay Version	2.6.0.31
Assay Name	20191010_114459 100ug
Project Info
Project Name
Project Number
Principal Investigator															Groups		Conditions
															Group #	Group Name	Injection Strategy	Pretreatments	Cell Type	XF Assay Medium
Group Layout		1													1	Background
	A	Background													2	Medium	Injections Undefined	Pretreatments Undefined	BioMaterial Undefined	Media Undefined
	B	Medium													3	Phonotype kit	Injections Undefined	Pretreatments Undefined	BioMaterial Undefined	Media Undefined
	C	Phonotype kit													4	MO	Injections Undefined	Pretreatments Undefined	BioMaterial Undefined	Media Undefined
	D	MO													5	MO+BPB	Injections Undefined	Pretreatments Undefined	BioMaterial Undefined	Media Undefined
	E	MO+BPB													6	MO+EDTA	Injections Undefined	Pretreatments Undefined	BioMaterial Undefined	Media Undefined
	F	MO+EDTA													7	Group 6	Injections Undefined	Pretreatments Undefined	BioMaterial Undefined	Media Undefined
	G	MO+EDTA													8	Group 7	Injections Undefined	Pretreatments Undefined	BioMaterial Undefined	Media Undefined
	H	Background													9	Group 8	Injections Undefined	Pretreatments Undefined	BioMaterial Undefined	Media Undefined
		Unassigned Well	Unselected Well	Assigned Well
Run Info
Plated On
Last Run	10/10/2019 11:15
Cartridge Barcode	C0017719019B**+456-6-685-5300F+237-2***000A+206-4**+000+0125&
Cartridge Type	C
Cartridge Serial	00177
Cartridge Lot	19019
Cartridge Validity	Valid
Plate Barcode	F0321419119V	Port A: 25 µL	Port B: 25 µL	Port C: 25 µL	Port D: 25 µL
Plate Type	F
Plate Serial	03214
Plate Lot	19119
Plate Orientation	V
Instrument Serial	431158
Protocol Summary
	Calibration	Basal	Injection 1	Injection 2
			Port(s): A	Port(s): B
	Equilibration: Yes	Mix: 00:03:00	Mix: 00:03:00	Mix: 00:03:00
		Wait: 00:00:00	Wait: 00:00:00	Wait: 00:00:00
		Measure: 00:03:00	Measure: 00:03:00	Measure: 00:03:00
		Cycles: 3	Cycles: 3	Cycles: 3
		Duration: 00:18:00	Duration: 00:18:00	Duration: 00:18:00
Calculation Settings
Atmospheric Pressure	760
Background Correction	Yes
% O2	100
O2 Settings
Calculation Method	AKOS
ksv	0.0206
Ksv Temp Correction	True
Corrected Ksv	0.0206064
Calculated FO	51572.3
Pseudo Volume	9.15
TAC	746
TAW	0
TW	296
TC	246
TP	60.9
pH Settings
Gain Equation	0	0	0.000456	-0.00685
ECAR Technique	Line Fit
Edge Offset	3
Temperature Gain Correction	False
Proton Efflux Settings
Default Buffer Factor	0
Calibration pH	7.4
Plate Volume	2.28
kVol	1.19
Normalization Settings
Normalization Unit:
Norm. Scale Factor:	1
Normalization Values:		1
	A
	B
	C
	D
	E
	F
	G
	H

## Sheet: Rate
Measurement	Well	Group	Time	OCR	ECAR	PPR
1	A01	Background	1.58916	0	0	0
1	B01	Medium	1.58916	181.387	69.1415	0
1	C01	Phonotype kit	1.58916	175.253	70.013	0
1	D01	MO	1.58916	175.889	57.8926	0
1	E01	MO+BPB	1.58916	188.427	56.9088	0
1	F01	MO+EDTA	1.58916	186.978	57.6183	0
1	G01	MO+EDTA	1.58916	179.965	55.6614	0
1	H01	Background	1.58916	0	0	0
2	A01	Background	8.19185	0	0	0
2	B01	Medium	8.19185	144.659	65.7638	0
2	C01	Phonotype kit	8.19185	148.325	68.384	0
2	D01	MO	8.19185	153.837	56.4255	0
2	E01	MO+BPB	8.19185	157.302	57.3624	0
2	F01	MO+EDTA	8.19185	156.331	54.9484	0
2	G01	MO+EDTA	8.19185	150.935	53.3241	0
2	H01	Background	8.19185	0	0	0
3	A01	Background	14.7979	0	0	0
3	B01	Medium	14.7979	131.456	64.1482	0
3	C01	Phonotype kit	14.7979	136.045	67.1667	0
3	D01	MO	14.7979	142.138	56.6916	0
3	E01	MO+BPB	14.7979	148.214	55.3318	0
3	F01	MO+EDTA	14.7979	147.139	54.0963	0
3	G01	MO+EDTA	14.7979	142.365	52.0351	0
3	H01	Background	14.7979	0	0	0
4	A01	Background	21.487	0	0	0
4	B01	Medium	21.487	121.39	65.5134	0
4	C01	Phonotype kit	21.487	158.836	88.835	0
4	D01	MO	21.487	167.32	64.6715	0
4	E01	MO+BPB	21.487	201.11	50.4496	0
4	F01	MO+EDTA	21.487	219.424	48.3211	0
4	G01	MO+EDTA	21.487	213.53	46.9791	0
4	H01	Background	21.487	0	0	0
5	A01	Background	28.0976	0	0	0
5	B01	Medium	28.0976	116.536	66.3743	0
5	C01	Phonotype kit	28.0976	137.72	79.5727	0
5	D01	MO	28.0976	156.205	62.598	0
5	E01	MO+BPB	28.0976	165.921	49.8335	0
5	F01	MO+EDTA	28.0976	173.429	48.1768	0
5	G01	MO+EDTA	28.0976	164.174	46.0351	0
5	H01	Background	28.0976	0	0	0
6	A01	Background	34.707	0	0	0
6	B01	Medium	34.707	110.755	67.8588	0
6	C01	Phonotype kit	34.707	126.184	77.4264	0
6	D01	MO	34.707	143.154	63.7251	0
6	E01	MO+BPB	34.707	151.37	49.8408	0
6	F01	MO+EDTA	34.707	157.51	48.2816	0
6	G01	MO+EDTA	34.707	148.309	46.0093	0
6	H01	Background	34.707	0	0	0
7	A01	Background	41.3949	0	0	0
7	B01	Medium	41.3949	105.366	68.855	0
7	C01	Phonotype kit	41.3949	115.391	76.5042	0
7	D01	MO	41.3949	140.616	64.0837	0
7	E01	MO+BPB	41.3949	145.633	50.2836	0
7	F01	MO+EDTA	41.3949	154.055	48.5308	0
7	G01	MO+EDTA	41.3949	146.115	48.2801	0
7	H01	Background	41.3949	0	0	0
8	A01	Background	47.9726	0	0	0
8	B01	Medium	47.9726	100.799	69.7749	0
8	C01	Phonotype kit	47.9726	110.175	76.4507	0
8	D01	MO	47.9726	145.324	64.948	0
8	E01	MO+BPB	47.9726	143.838	50.5704	0
8	F01	MO+EDTA	47.9726	155.852	51.2695	0
8	G01	MO+EDTA	47.9726	146.919	48.4649	0
8	H01	Background	47.9726	0	0	0
9	A01	Background	54.5507	0	0	0
9	B01	Medium	54.5507	96.6563	70.3756	0
9	C01	Phonotype kit	54.5507	106.555	75.6534	0
9	D01	MO	54.5507	149.327	65.6325	0
9	E01	MO+BPB	54.5507	142.856	51.8641	0
9	F01	MO+EDTA	54.5507	160.437	51.7082	0
9	G01	MO+EDTA	54.5507	151.481	48.7744	0
9	H01	Background	54.5507	0	0	0

## Sheet: Normalized Rate
Measurement	Well	Group	Time	OCR	ECAR	PPR

## Sheet: Baselined Rate
Measurement	Well	Group	Time	OCR	ECAR	PPR

## Sheet: styles
Bold style			Template Version:	1
Italic style
underline style
grid style
Gagnam style!
Grid Title style
Error Style
Good Style
Low-key error style
grid error style
blue fill
red fill
green fill
orange fill
tan fill
blue fill
red fill
green fill
orange fill
tan fill
Normal style
Right-justify
Center
Right-justify grid
Center grid
Right-justify
Center
double_Format
NERD_STYLE_GRID
Unassigned Well
Unselected Well
Unassigned Well
Unselected Well
grid_double_Format
mega double
Baseline Rate
BOLD_NERD_STYLE

[truncated: 8 more sheets: Version, Summary Printout, Image, Normalize, Measures Sheet, Assay Parameter per Well, Glossary, unselectedwell]
