# Supplementary material for: The Contribution of Phospholipase A2 and Metalloproteinases to the Synergistic Action of Viper Venom on the Bioenergetic Profile of Vero Cells
Source: Toxins (Basel). 2022 Oct 23;14(11):724. doi: 10.3390/toxins14110724 (PMC9695613; doi:10.3390/toxins14110724)
Supplement: Supplementary file 1 [file toxins-14-00724-s001.zip › Table S2.xlsm]

## Sheet: L-Normalized Rate (Copy)
Measurement	Well	Group	Time	OCR	ECAR	PPR					Cycles	Value		GroupName	Selected?		Error Type
1	A01	Background	1.56304	0	0	0					Basal	3		Control	TRUE		Standard Deviation	TRUE	FALSE
1	B01	Control	1.56304	154.424	77.4669	137.767						5		LPS (1 ug/ml)	TRUE
1	C01	Control	1.56304	164.436	78.7171	139.991						0
1	D01	Control	1.56304	170.474	69.8187	124.166						0
1	E01	LPS (1 ug/ml)	1.56304	200.766	103.101	183.354						0
1	F01	LPS (1 ug/ml)	1.56304	210.583	109.323	194.42
1	G01	LPS (1 ug/ml)	1.56304	184.519	86.693	154.175
1	H01	Background	1.56304	0	0	0
2	A01	Background	7.09669	0	0	0
2	B01	Control	7.09669	138.952	62.1552	110.537
2	C01	Control	7.09669	150.131	67.4241	119.907
2	D01	Control	7.09669	154.854	56.7095	100.852
2	E01	LPS (1 ug/ml)	7.09669	179.323	75.6732	134.577
2	F01	LPS (1 ug/ml)	7.09669	190.305	86.5832	153.98
2	G01	LPS (1 ug/ml)	7.09669	169.843	71.6799	127.476
2	H01	Background	7.09669	0	0	0
3	A01	Background	12.6256	0	0	0
3	B01	Control	12.6256	135.453	62.7622	111.616
3	C01	Control	12.6256	146.293	69.7346	124.016
3	D01	Control	12.6256	151.066	59.218	105.313
3	E01	LPS (1 ug/ml)	12.6256	171.426	74.0064	131.613
3	F01	LPS (1 ug/ml)	12.6256	182.679	86.1009	153.122
3	G01	LPS (1 ug/ml)	12.6256	163.488	69.9472	124.394
3	H01	Background	12.6256	0	0	0
4	A01	Background	18.2352	0	0	0
4	B01	Control	18.2352	165.503	121.501	216.078
4	C01	Control	18.2352	222.024	139.037	247.264
4	D01	Control	18.2352	228.195	131.079	233.111
4	E01	LPS (1 ug/ml)	18.2352	294.653	154.226	274.276
4	F01	LPS (1 ug/ml)	18.2352	332.854	162.374	288.765
4	G01	LPS (1 ug/ml)	18.2352	294.067	138.609	246.502
4	H01	Background	18.2352	0	0	0
5	A01	Background	23.772	0	0	0
5	B01	Control	23.772	131.034	110.473	196.465
5	C01	Control	23.772	174.12	121.827	216.657
5	D01	Control	23.772	183.335	111.725	198.693
5	E01	LPS (1 ug/ml)	23.772	227.041	124.333	221.113
5	F01	LPS (1 ug/ml)	23.772	297.551	140.264	249.446
5	G01	LPS (1 ug/ml)	23.772	249.508	123.613	219.834
5	H01	Background	23.772	0	0	0
6	A01	Background	29.3022	0	0	0
6	B01	Control	29.3022	123.248	107.938	191.956
6	C01	Control	29.3022	160.911	119.502	212.523
6	D01	Control	29.3022	168.968	106.594	189.566
6	E01	LPS (1 ug/ml)	29.3022	196.129	120.097	213.58
6	F01	LPS (1 ug/ml)	29.3022	263.719	135.919	241.718
6	G01	LPS (1 ug/ml)	29.3022	221.783	121.081	215.331
6	H01	Background	29.3022	0	0	0
7	A01	Background	34.8316	0	0	0
7	B01	Control	34.8316	122.271	112.077	199.317
7	C01	Control	34.8316	155.92	122.173	217.272
7	D01	Control	34.8316	165.305	109.637	194.978
7	E01	LPS (1 ug/ml)	34.8316	187.875	124.306	221.066
7	F01	LPS (1 ug/ml)	34.8316	248.764	139.022	247.236
7	G01	LPS (1 ug/ml)	34.8316	209.868	123.624	219.854
7	H01	Background	34.8316	0	0	0
8	A01	Background	40.3698	0	0	0															BASELINE				MAXIMAL
8	B01	Control	40.3698	124.044	116.475	207.138
8	C01	Control	40.3698	154.248	127.107	226.047
8	D01	Control	40.3698	164.247	114.184	203.065														GST-GLUCOSE-No Pretreatments	22.1105	3.65853	160.703	13.9487	91.6944	10.2905	137.937	13.2149
8	E01	LPS (1 ug/ml)	40.3698	186.699	129.282	229.915														MST-OLIGO-No Pretreatments	34.4535	5.68932	149.468	11.1549	77.5115	7.85346	368.212	32.8695
8	F01	LPS (1 ug/ml)	40.3698	241.13	142.719	253.812
8	G01	LPS (1 ug/ml)	40.3698	203.935	124.226	220.924
8	H01	Background	40.3698	0	0	0

## Sheet: L-Normalized Rate
Measurement	Well	Group	Time	OCR	ECAR	PPR					Cycles	Value		GroupName	Selected?		Error Type
1	A01	Background	1.56304	0	0	0					Basal	3		Control	TRUE		Standard Deviation	TRUE	FALSE
1	B01	Control	1.56304	154.424	77.4669	137.767						5		LPS (1 ug/ml)	TRUE
1	C01	Control	1.56304	164.436	78.7171	139.991						0
1	D01	Control	1.56304	170.474	69.8187	124.166						0
1	E01	LPS (1 ug/ml)	1.56304	200.766	103.101	183.354						0
1	F01	LPS (1 ug/ml)	1.56304	210.583	109.323	194.42
1	G01	LPS (1 ug/ml)	1.56304	184.519	86.693	154.175
1	H01	Background	1.56304	0	0	0
2	A01	Background	7.09669	0	0	0
2	B01	Control	7.09669	138.952	62.1552	110.537
2	C01	Control	7.09669	150.131	67.4241	119.907
2	D01	Control	7.09669	154.854	56.7095	100.852
2	E01	LPS (1 ug/ml)	7.09669	179.323	75.6732	134.577
2	F01	LPS (1 ug/ml)	7.09669	190.305	86.5832	153.98
2	G01	LPS (1 ug/ml)	7.09669	169.843	71.6799	127.476
2	H01	Background	7.09669	0	0	0
3	A01	Background	12.6256	0	0	0
3	B01	Control	12.6256	135.453	62.7622	111.616
3	C01	Control	12.6256	146.293	69.7346	124.016
3	D01	Control	12.6256	151.066	59.218	105.313
3	E01	LPS (1 ug/ml)	12.6256	171.426	74.0064	131.613
3	F01	LPS (1 ug/ml)	12.6256	182.679	86.1009	153.122
3	G01	LPS (1 ug/ml)	12.6256	163.488	69.9472	124.394
3	H01	Background	12.6256	0	0	0
4	A01	Background	18.2352	0	0	0
4	B01	Control	18.2352	165.503	121.501	216.078
4	C01	Control	18.2352	222.024	139.037	247.264
4	D01	Control	18.2352	228.195	131.079	233.111
4	E01	LPS (1 ug/ml)	18.2352	294.653	154.226	274.276
4	F01	LPS (1 ug/ml)	18.2352	332.854	162.374	288.765
4	G01	LPS (1 ug/ml)	18.2352	294.067	138.609	246.502
4	H01	Background	18.2352	0	0	0
5	A01	Background	23.772	0	0	0
5	B01	Control	23.772	131.034	110.473	196.465
5	C01	Control	23.772	174.12	121.827	216.657
5	D01	Control	23.772	183.335	111.725	198.693
5	E01	LPS (1 ug/ml)	23.772	227.041	124.333	221.113
5	F01	LPS (1 ug/ml)	23.772	297.551	140.264	249.446
5	G01	LPS (1 ug/ml)	23.772	249.508	123.613	219.834
5	H01	Background	23.772	0	0	0
6	A01	Background	29.3022	0	0	0
6	B01	Control	29.3022	123.248	107.938	191.956
6	C01	Control	29.3022	160.911	119.502	212.523
6	D01	Control	29.3022	168.968	106.594	189.566
6	E01	LPS (1 ug/ml)	29.3022	196.129	120.097	213.58
6	F01	LPS (1 ug/ml)	29.3022	263.719	135.919	241.718
6	G01	LPS (1 ug/ml)	29.3022	221.783	121.081	215.331
6	H01	Background	29.3022	0	0	0
7	A01	Background	34.8316	0	0	0
7	B01	Control	34.8316	122.271	112.077	199.317
7	C01	Control	34.8316	155.92	122.173	217.272
7	D01	Control	34.8316	165.305	109.637	194.978
7	E01	LPS (1 ug/ml)	34.8316	187.875	124.306	221.066
7	F01	LPS (1 ug/ml)	34.8316	248.764	139.022	247.236
7	G01	LPS (1 ug/ml)	34.8316	209.868	123.624	219.854
7	H01	Background	34.8316	0	0	0
8	A01	Background	40.3698	0	0	0															BASELINE				MAXIMAL
8	B01	Control	40.3698	124.044	116.475	207.138
8	C01	Control	40.3698	154.248	127.107	226.047
8	D01	Control	40.3698	164.247	114.184	203.065														GST-GLUCOSE-No Pretreatments	22.1105	3.65853	160.703	13.9487	91.6944	10.2905	137.937	13.2149
8	E01	LPS (1 ug/ml)	40.3698	186.699	129.282	229.915														MST-OLIGO-No Pretreatments	34.4535	5.68932	149.468	11.1549	77.5115	7.85346	368.212	32.8695
8	F01	LPS (1 ug/ml)	40.3698	241.13	142.719	253.812
8	G01	LPS (1 ug/ml)	40.3698	203.935	124.226	220.924
8	H01	Background	40.3698	0	0	0

## Sheet: groups
Measurement	Well	Group	Time	OCR	ECAR	PPR					Cycles	Value		GroupName	Selected?		Error Type
1	A01	Background	1.56304	0	0	0					Basal	3		MO	TRUE		Standard Deviation	TRUE	TRUE
1	B01	Control	1.56304	154.424	77.4669	137.767						3		MO+BPB	TRUE
1	C01	Control	1.56304	164.436	78.7171	139.991						3		MO+EDTA	TRUE
1	D01	Control	1.56304	170.474	69.8187	124.166						0		Mediaum	TRUE
1	E01	LPS (1 ug/ml)	1.56304	200.766	103.101	183.354						0		Pheotype Kit	TRUE
1	F01	LPS (1 ug/ml)	1.56304	210.583	109.323	194.42
1	G01	LPS (1 ug/ml)	1.56304	184.519	86.693	154.175
1	H01	Background	1.56304	0	0	0
2	A01	Background	7.09669	0	0	0
2	B01	Control	7.09669	138.952	62.1552	110.537
2	C01	Control	7.09669	150.131	67.4241	119.907
2	D01	Control	7.09669	154.854	56.7095	100.852
2	E01	LPS (1 ug/ml)	7.09669	179.323	75.6732	134.577
2	F01	LPS (1 ug/ml)	7.09669	190.305	86.5832	153.98
2	G01	LPS (1 ug/ml)	7.09669	169.843	71.6799	127.476
2	H01	Background	7.09669	0	0	0
3	A01	Background	12.6256	0	0	0
3	B01	Control	12.6256	135.453	62.7622	111.616
3	C01	Control	12.6256	146.293	69.7346	124.016
3	D01	Control	12.6256	151.066	59.218	105.313
3	E01	LPS (1 ug/ml)	12.6256	171.426	74.0064	131.613
3	F01	LPS (1 ug/ml)	12.6256	182.679	86.1009	153.122
3	G01	LPS (1 ug/ml)	12.6256	163.488	69.9472	124.394
3	H01	Background	12.6256	0	0	0
4	A01	Background	18.2352	0	0	0
4	B01	Control	18.2352	165.503	121.501	216.078
4	C01	Control	18.2352	222.024	139.037	247.264
4	D01	Control	18.2352	228.195	131.079	233.111
4	E01	LPS (1 ug/ml)	18.2352	294.653	154.226	274.276
4	F01	LPS (1 ug/ml)	18.2352	332.854	162.374	288.765
4	G01	LPS (1 ug/ml)	18.2352	294.067	138.609	246.502
4	H01	Background	18.2352	0	0	0
5	A01	Background	23.772	0	0	0
5	B01	Control	23.772	131.034	110.473	196.465
5	C01	Control	23.772	174.12	121.827	216.657
5	D01	Control	23.772	183.335	111.725	198.693
5	E01	LPS (1 ug/ml)	23.772	227.041	124.333	221.113
5	F01	LPS (1 ug/ml)	23.772	297.551	140.264	249.446
5	G01	LPS (1 ug/ml)	23.772	249.508	123.613	219.834
5	H01	Background	23.772	0	0	0
6	A01	Background	29.3022	0	0	0
6	B01	Control	29.3022	123.248	107.938	191.956
6	C01	Control	29.3022	160.911	119.502	212.523
6	D01	Control	29.3022	168.968	106.594	189.566
6	E01	LPS (1 ug/ml)	29.3022	196.129	120.097	213.58
6	F01	LPS (1 ug/ml)	29.3022	263.719	135.919	241.718
6	G01	LPS (1 ug/ml)	29.3022	221.783	121.081	215.331
6	H01	Background	29.3022	0	0	0
7	A01	Background	34.8316	0	0	0
7	B01	Control	34.8316	122.271	112.077	199.317
7	C01	Control	34.8316	155.92	122.173	217.272
7	D01	Control	34.8316	165.305	109.637	194.978
7	E01	LPS (1 ug/ml)	34.8316	187.875	124.306	221.066
7	F01	LPS (1 ug/ml)	34.8316	248.764	139.022	247.236
7	G01	LPS (1 ug/ml)	34.8316	209.868	123.624	219.854
7	H01	Background	34.8316	0	0	0
8	A01	Background	40.3698	0	0	0															BASELINE				MAXIMAL
8	B01	Control	40.3698	124.044	116.475	207.138
8	C01	Control	40.3698	154.248	127.107	226.047
8	D01	Control	40.3698	164.247	114.184	203.065															22.1105	3.65853	160.703	13.9487	91.6944	10.2905	137.937	13.2149
8	E01	LPS (1 ug/ml)	40.3698	186.699	129.282	229.915															34.4535	5.68932	149.468	11.1549	77.5115	7.85346	368.212	32.8695
8	F01	LPS (1 ug/ml)	40.3698	241.13	142.719	253.812
8	G01	LPS (1 ug/ml)	40.3698	203.935	124.226	220.924
8	H01	Background	40.3698	0	0	0

## Sheet: L-Rate
Measurement	Well	Group	Time	OCR	ECAR	PPR					Cycles	Value		GroupName	Selected?		Error Type
1	A01	Background	1.56304	0	0	0					Basal	6		C. Elegans 10k	TRUE		Standard Deviation	TRUE	TRUE
1	B01	Control	1.56304	154.424	77.4669	137.767						10		C. Elegans 20k	TRUE
1	C01	Control	1.56304	164.436	78.7171	139.991						0
1	D01	Control	1.56304	170.474	69.8187	124.166						0
1	E01	LPS (1 ug/ml)	1.56304	200.766	103.101	183.354						0
1	F01	LPS (1 ug/ml)	1.56304	210.583	109.323	194.42
1	G01	LPS (1 ug/ml)	1.56304	184.519	86.693	154.175
1	H01	Background	1.56304	0	0	0
2	A01	Background	7.09669	0	0	0
2	B01	Control	7.09669	138.952	62.1552	110.537
2	C01	Control	7.09669	150.131	67.4241	119.907
2	D01	Control	7.09669	154.854	56.7095	100.852
2	E01	LPS (1 ug/ml)	7.09669	179.323	75.6732	134.577
2	F01	LPS (1 ug/ml)	7.09669	190.305	86.5832	153.98
2	G01	LPS (1 ug/ml)	7.09669	169.843	71.6799	127.476
2	H01	Background	7.09669	0	0	0
3	A01	Background	12.6256	0	0	0
3	B01	Control	12.6256	135.453	62.7622	111.616
3	C01	Control	12.6256	146.293	69.7346	124.016
3	D01	Control	12.6256	151.066	59.218	105.313
3	E01	LPS (1 ug/ml)	12.6256	171.426	74.0064	131.613
3	F01	LPS (1 ug/ml)	12.6256	182.679	86.1009	153.122
3	G01	LPS (1 ug/ml)	12.6256	163.488	69.9472	124.394
3	H01	Background	12.6256	0	0	0
4	A01	Background	18.2352	0	0	0
4	B01	Control	18.2352	165.503	121.501	216.078
4	C01	Control	18.2352	222.024	139.037	247.264
4	D01	Control	18.2352	228.195	131.079	233.111
4	E01	LPS (1 ug/ml)	18.2352	294.653	154.226	274.276
4	F01	LPS (1 ug/ml)	18.2352	332.854	162.374	288.765
4	G01	LPS (1 ug/ml)	18.2352	294.067	138.609	246.502
4	H01	Background	18.2352	0	0	0
5	A01	Background	23.772	0	0	0
5	B01	Control	23.772	131.034	110.473	196.465
5	C01	Control	23.772	174.12	121.827	216.657
5	D01	Control	23.772	183.335	111.725	198.693
5	E01	LPS (1 ug/ml)	23.772	227.041	124.333	221.113
5	F01	LPS (1 ug/ml)	23.772	297.551	140.264	249.446
5	G01	LPS (1 ug/ml)	23.772	249.508	123.613	219.834
5	H01	Background	23.772	0	0	0
6	A01	Background	29.3022	0	0	0
6	B01	Control	29.3022	123.248	107.938	191.956
6	C01	Control	29.3022	160.911	119.502	212.523
6	D01	Control	29.3022	168.968	106.594	189.566
6	E01	LPS (1 ug/ml)	29.3022	196.129	120.097	213.58
6	F01	LPS (1 ug/ml)	29.3022	263.719	135.919	241.718
6	G01	LPS (1 ug/ml)	29.3022	221.783	121.081	215.331
6	H01	Background	29.3022	0	0	0
7	A01	Background	34.8316	0	0	0
7	B01	Control	34.8316	122.271	112.077	199.317
7	C01	Control	34.8316	155.92	122.173	217.272
7	D01	Control	34.8316	165.305	109.637	194.978
7	E01	LPS (1 ug/ml)	34.8316	187.875	124.306	221.066
7	F01	LPS (1 ug/ml)	34.8316	248.764	139.022	247.236
7	G01	LPS (1 ug/ml)	34.8316	209.868	123.624	219.854
7	H01	Background	34.8316	0	0	0
8	A01	Background	40.3698	0	0	0															BASELINE				MAXIMAL
8	B01	Control	40.3698	124.044	116.475	207.138
8	C01	Control	40.3698	154.248	127.107	226.047
8	D01	Control	40.3698	164.247	114.184	203.065														GST-GLUCOSE-No Pretreatments	22.1105	3.65853	160.703	13.9487	91.6944	10.2905	137.937	13.2149
8	E01	LPS (1 ug/ml)	40.3698	186.699	129.282	229.915														MST-OLIGO-No Pretreatments	34.4535	5.68932	149.468	11.1549	77.5115	7.85346	368.212	32.8695
8	F01	LPS (1 ug/ml)	40.3698	241.13	142.719	253.812
8	G01	LPS (1 ug/ml)	40.3698	203.935	124.226	220.924
8	H01	Background	40.3698	0	0	0

## Sheet: Rate (Copy)
Measurement	Well	Group	Time	OCR	ECAR	PPR
1	A01	Background	1.59407	0	0	0
1	B01	Mediaum	1.59407	253.11	77.4201	0
1	C01	Pheotype Kit	1.59407	285.423	79.7655	0
1	D01	MO	1.59407	270.88	81.6394	0
1	E01	MO+BPB	1.59407	255.211	78.7407	0
1	F01	MO+EDTA	1.59407	256.885	81.2898	0
1	G01	MO+EDTA	1.59407	276.099	87.2741	0
1	H01	Background	1.59407	0	0	0
2	A01	Background	8.19387	0	0	0
2	B01	Mediaum	8.19387	220.914	84.0144	0
2	C01	Pheotype Kit	8.19387	241.973	91.2342	0
2	D01	MO	8.19387	237.13	91.9006	0
2	E01	MO+BPB	8.19387	222.171	87.3996	0
2	F01	MO+EDTA	8.19387	226.92	89.1668	0
2	G01	MO+EDTA	8.19387	236.924	99.2887	0
2	H01	Background	8.19387	0	0	0
3	A01	Background	14.8025	0	0	0
3	B01	Mediaum	14.8025	215.774	90.3057	0
3	C01	Pheotype Kit	14.8025	235.148	98.9667	0
3	D01	MO	14.8025	232.83	101.571	0
3	E01	MO+BPB	14.8025	219.193	96.5358	0
3	F01	MO+EDTA	14.8025	221.81	97.9397	0
3	G01	MO+EDTA	14.8025	232.547	108.255	0
3	H01	Background	14.8025	0	0	0
4	A01	Background	21.4874	0	0	0
4	B01	Mediaum	21.4874	212.478	95.2002	0
4	C01	Pheotype Kit	21.4874	297.682	143.867	0
4	D01	MO	21.4874	268.999	109.215	0
4	E01	MO+BPB	21.4874	238.375	100.32	0
4	F01	MO+EDTA	21.4874	247.676	100.192	0
4	G01	MO+EDTA	21.4874	260.677	113.968	0
4	H01	Background	21.4874	0	0	0
5	A01	Background	28.0926	0	0	0
5	B01	Mediaum	28.0926	221.277	99.6232	0
5	C01	Pheotype Kit	28.0926	305.921	136.586	0
5	D01	MO	28.0926	334.092	118.686	0
5	E01	MO+BPB	28.0926	264.929	111.16	0
5	F01	MO+EDTA	28.0926	258.971	103.759	0
5	G01	MO+EDTA	28.0926	271.182	117.013	0
5	H01	Background	28.0926	0	0	0
6	A01	Background	34.6993	0	0	0
6	B01	Mediaum	34.6993	228.414	104.622	0
6	C01	Pheotype Kit	34.6993	284.663	135.533	0
6	D01	MO	34.6993	448.251	199.202	0
6	E01	MO+BPB	34.6993	291.286	73.2881	0
6	F01	MO+EDTA	34.6993	401.533	147.046	0
6	G01	MO+EDTA	34.6993	496.871	168.889	0
6	H01	Background	34.6993	0	0	0
7	A01	Background	41.3888	0	0	0
7	B01	Mediaum	41.3888	230.538	107.333	0
7	C01	Pheotype Kit	41.3888	269.346	134.238	0
7	D01	MO	41.3888	137.504	100.221	0
7	E01	MO+BPB	41.3888	189.865	73.4106	0
7	F01	MO+EDTA	41.3888	540.863	195.846	0
7	G01	MO+EDTA	41.3888	253.656	145.531	0
7	H01	Background	41.3888	0	0	0
8	A01	Background	48.0071	0	0	0
8	B01	Mediaum	48.0071	230.997	107.945	0
8	C01	Pheotype Kit	48.0071	257.666	132.991	0
8	D01	MO	48.0071	197.954	147.114	0
8	E01	MO+BPB	48.0071	86.0429	28.451	0
8	F01	MO+EDTA	48.0071	86.0106	18.8231	0
8	G01	MO+EDTA	48.0071	120.856	38.6663	0
8	H01	Background	48.0071	0	0	0
9	A01	Background	54.6129	0	0	0
9	B01	Mediaum	54.6129	233.456	107.521	0
9	C01	Pheotype Kit	54.6129	250.011	130.821	0
9	D01	MO	54.6129	186.765	140.424	0
9	E01	MO+BPB	54.6129	158.623	47.5397	0
9	F01	MO+EDTA	54.6129	121.123	27.3476	0
9	G01	MO+EDTA	54.6129	140.823	37.601	0
9	H01	Background	54.6129	0	0	0

## Sheet: Assay Configuration
XFe Assay Version	2.6.0.31
Assay Name	10 ug 20191010_014333
Project Info
Project Name
Project Number
Principal Investigator															Groups		Conditions
															Group #	Group Name	Injection Strategy	Pretreatments	Cell Type	XF Assay Medium
Group Layout		1													1	Background
	A	Background													2	Mediaum	Injections Undefined	Pretreatments Undefined	BioMaterial Undefined	Media Undefined
	B	Mediaum													3	Pheotype Kit	Injections Undefined	Pretreatments Undefined	BioMaterial Undefined	Media Undefined
	C	Pheotype Kit													4	MO	Injections Undefined	Pretreatments Undefined	BioMaterial Undefined	Media Undefined
	D	MO													5	MO+BPB	Injections Undefined	Pretreatments Undefined	BioMaterial Undefined	Media Undefined
	E	MO+BPB													6	MO+EDTA	Injections Undefined	Pretreatments Undefined	BioMaterial Undefined	Media Undefined
	F	MO+EDTA													7	Group 6	Injections Undefined	Pretreatments Undefined	BioMaterial Undefined	Media Undefined
	G	MO+EDTA													8	Group 7	Injections Undefined	Pretreatments Undefined	BioMaterial Undefined	Media Undefined
	H	Background													9	Group 8	Injections Undefined	Pretreatments Undefined	BioMaterial Undefined	Media Undefined
		Unassigned Well	Unselected Well	Assigned Well
Run Info
Plated On
Last Run	10/10/2019 13:19
Cartridge Barcode	C0016419019B**+456-6-685-5300F+237-2***000A+206-4**+000+0125&
Cartridge Type	C
Cartridge Serial	00164
Cartridge Lot	19019
Cartridge Validity	Valid
Plate Barcode	F0321619119V	Port A: 25 µL	Port B: 25 µL	Port C: 25 µL	Port D: 25 µL
Plate Type	F
Plate Serial	03216
Plate Lot	19119
Plate Orientation	V
Instrument Serial	431158
Protocol Summary
	Calibration	Basal	Injection 1	Injection 2
			Port(s): A	Port(s): B
	Equilibration: Yes	Mix: 00:03:00	Mix: 00:03:00	Mix: 00:03:00
		Wait: 00:00:00	Wait: 00:00:00	Wait: 00:00:00
		Measure: 00:03:00	Measure: 00:03:00	Measure: 00:03:00
		Cycles: 3	Cycles: 3	Cycles: 3
		Duration: 00:18:00	Duration: 00:18:00	Duration: 00:18:00
Calculation Settings
Atmospheric Pressure	760
Background Correction	Yes
% O2	100
O2 Settings
Calculation Method	AKOS
ksv	0.0206
Ksv Temp Correction	True
Corrected Ksv	0.020607
Calculated FO	51573.2
Pseudo Volume	9.15
TAC	746
TAW	0
TW	296
TC	246
TP	60.9
pH Settings
Gain Equation	0	0	0.000456	-0.00685
ECAR Technique	Line Fit
Edge Offset	3
Temperature Gain Correction	False
Proton Efflux Settings
Default Buffer Factor	0
Calibration pH	7.4
Plate Volume	2.28
kVol	1.19
Normalization Settings
Normalization Unit:
Norm. Scale Factor:	1
Normalization Values:		1
	A
	B
	C
	D
	E
	F
	G
	H

## Sheet: Rate
Measurement	Well	Group	Time	OCR	ECAR	PPR
1	A01	Background	1.59407	0	0	0
1	B01	Mediaum	1.59407	253.11	77.4201	0
1	C01	Pheotype Kit	1.59407	285.423	79.7655	0
1	D01	MO	1.59407	270.88	81.6394	0
1	E01	MO+BPB	1.59407	255.211	78.7407	0
1	F01	MO+EDTA	1.59407	256.885	81.2898	0
1	G01	MO+EDTA	1.59407	276.099	87.2741	0
1	H01	Background	1.59407	0	0	0
2	A01	Background	8.19387	0	0	0
2	B01	Mediaum	8.19387	220.914	84.0144	0
2	C01	Pheotype Kit	8.19387	241.973	91.2342	0
2	D01	MO	8.19387	237.13	91.9006	0
2	E01	MO+BPB	8.19387	222.171	87.3996	0
2	F01	MO+EDTA	8.19387	226.92	89.1668	0
2	G01	MO+EDTA	8.19387	236.924	99.2887	0
2	H01	Background	8.19387	0	0	0
3	A01	Background	14.8025	0	0	0
3	B01	Mediaum	14.8025	215.774	90.3057	0
3	C01	Pheotype Kit	14.8025	235.148	98.9667	0
3	D01	MO	14.8025	232.83	101.571	0
3	E01	MO+BPB	14.8025	219.193	96.5358	0
3	F01	MO+EDTA	14.8025	221.81	97.9397	0
3	G01	MO+EDTA	14.8025	232.547	108.255	0
3	H01	Background	14.8025	0	0	0
4	A01	Background	21.4874	0	0	0
4	B01	Mediaum	21.4874	212.478	95.2002	0
4	C01	Pheotype Kit	21.4874	297.682	143.867	0
4	D01	MO	21.4874	268.999	109.215	0
4	E01	MO+BPB	21.4874	238.375	100.32	0
4	F01	MO+EDTA	21.4874	247.676	100.192	0
4	G01	MO+EDTA	21.4874	260.677	113.968	0
4	H01	Background	21.4874	0	0	0
5	A01	Background	28.0926	0	0	0
5	B01	Mediaum	28.0926	221.277	99.6232	0
5	C01	Pheotype Kit	28.0926	305.921	136.586	0
5	D01	MO	28.0926	334.092	118.686	0
5	E01	MO+BPB	28.0926	264.929	111.16	0
5	F01	MO+EDTA	28.0926	258.971	103.759	0
5	G01	MO+EDTA	28.0926	271.182	117.013	0
5	H01	Background	28.0926	0	0	0
6	A01	Background	34.6993	0	0	0
6	B01	Mediaum	34.6993	228.414	104.622	0
6	C01	Pheotype Kit	34.6993	284.663	135.533	0
6	D01	MO	34.6993	448.251	199.202	0
6	E01	MO+BPB	34.6993	291.286	73.2881	0
6	F01	MO+EDTA	34.6993	401.533	147.046	0
6	G01	MO+EDTA	34.6993	496.871	168.889	0
6	H01	Background	34.6993	0	0	0
7	A01	Background	41.3888	0	0	0
7	B01	Mediaum	41.3888	230.538	107.333	0
7	C01	Pheotype Kit	41.3888	269.346	134.238	0
7	D01	MO	41.3888	137.504	100.221	0
7	E01	MO+BPB	41.3888	189.865	73.4106	0
7	F01	MO+EDTA	41.3888	540.863	195.846	0
7	G01	MO+EDTA	41.3888	253.656	145.531	0
7	H01	Background	41.3888	0	0	0
8	A01	Background	48.0071	0	0	0
8	B01	Mediaum	48.0071	230.997	107.945	0
8	C01	Pheotype Kit	48.0071	257.666	132.991	0
8	D01	MO	48.0071	197.954	147.114	0
8	E01	MO+BPB	48.0071	86.0429	28.451	0
8	F01	MO+EDTA	48.0071	86.0106	18.8231	0
8	G01	MO+EDTA	48.0071	120.856	38.6663	0
8	H01	Background	48.0071	0	0	0
9	A01	Background	54.6129	0	0	0
9	B01	Mediaum	54.6129	233.456	107.521	0
9	C01	Pheotype Kit	54.6129	250.011	130.821	0
9	D01	MO	54.6129	186.765	140.424	0
9	E01	MO+BPB	54.6129	158.623	47.5397	0
9	F01	MO+EDTA	54.6129	121.123	27.3476	0
9	G01	MO+EDTA	54.6129	140.823	37.601	0
9	H01	Background	54.6129	0	0	0

## Sheet: Normalized Rate
Measurement	Well	Group	Time	OCR	ECAR	PPR

## Sheet: Baselined Rate
Measurement	Well	Group	Time	OCR	ECAR	PPR

## Sheet: styles
Bold style			Template Version:	1
Italic style
underline style
grid style
Gagnam style!
Grid Title style
Error Style
Good Style
Low-key error style
grid error style
blue fill
red fill
green fill
orange fill
tan fill
blue fill
red fill
green fill
orange fill
tan fill
Normal style
Right-justify
Center
Right-justify grid
Center grid
Right-justify
Center
double_Format
NERD_STYLE_GRID
Unassigned Well
Unselected Well
Unassigned Well
Unselected Well
grid_double_Format
mega double
Baseline Rate
BOLD_NERD_STYLE

[truncated: 8 more sheets: Version, Summary Printout, Image, Normalize, Measures Sheet, Assay Parameter per Well, Glossary, unselectedwell]
